# Supplementary material for: ANN Architecture Specifications for Modelling of Open-Cell Aluminum under Compression
Source: Hindawi journal article supplement (doi:10.1155/2020/2834317), 2020-02-28
Supplement: f1 [file 2834317.f1.pdf]

# 1 Mathematical Problems in Engineering

## 2 ANN architecture specifications for modelling of open-cell 3 aluminum under compression

4 Marek Dudzik, <sup>1</sup> and Anna Małgorzata Stręk, <sup>2</sup>

5 <sup>1</sup> Cracow University of Technology, Faculty of Electrical and Computer Engineering,  
6 Department of Traction and Traffic Control, ul. Warszawska 24, 31-155 Kraków, Poland;  
7 marekdudzik@pk.edu.pl.

8 <sup>2</sup> Cracow University of Technology, Faculty of Civil Engineering, Institute of Structural  
9 Mechanics, ul. Warszawska 24, 31-155 Kraków, Poland; anna.strek@pk.edu.pl.

10 Correspondence: marekdudzik@pk.edu.pl (M.D.), anna.strek@pk.edu.pl (AM.S.)

### 11 Supplementary Materials

12

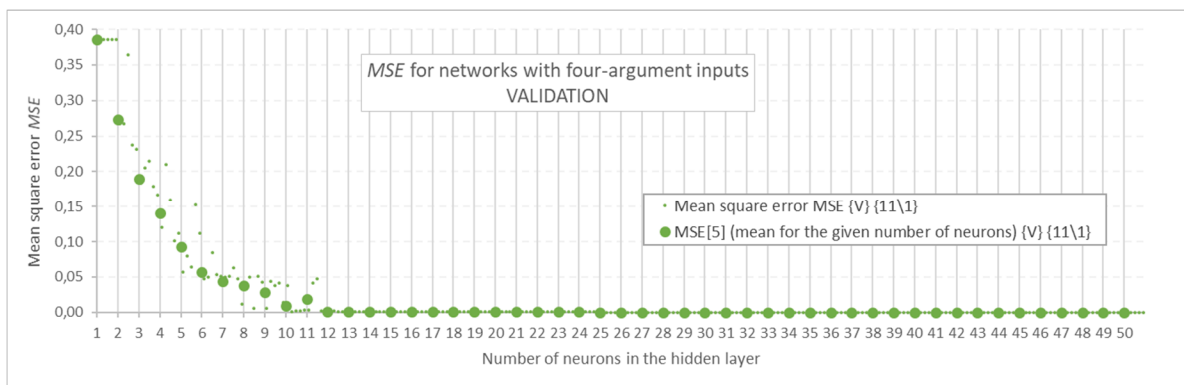

13

14 Figure A.1. Values of  $MSE$ ,  $MSE_{[5]}$  in dependence of the number of neurons in the hidden layer for networks  
15 for 11-samples input, sample no. 1 excluded.

16

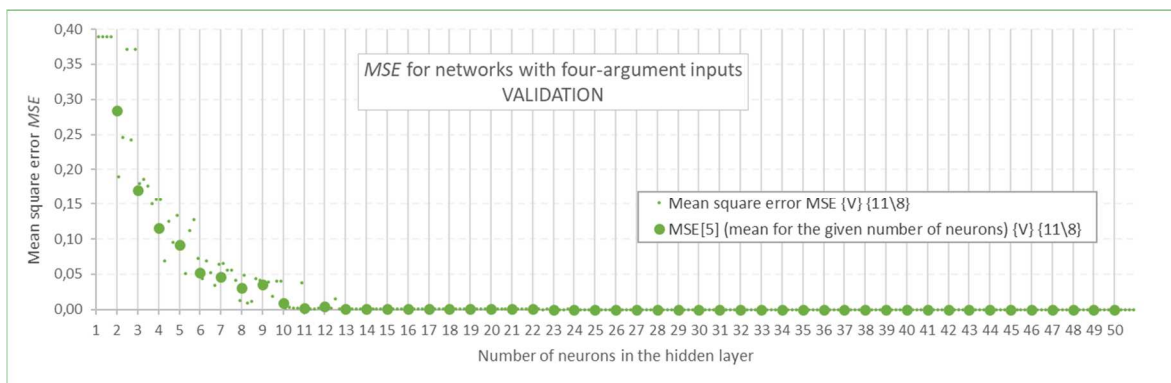

17

18 Figure A.2. Values of  $MSE$ ,  $MSE_{[5]}$  in dependence of the number of neurons in the hidden layer for networks  
19 for 11-samples input, sample no. 8 excluded.

20

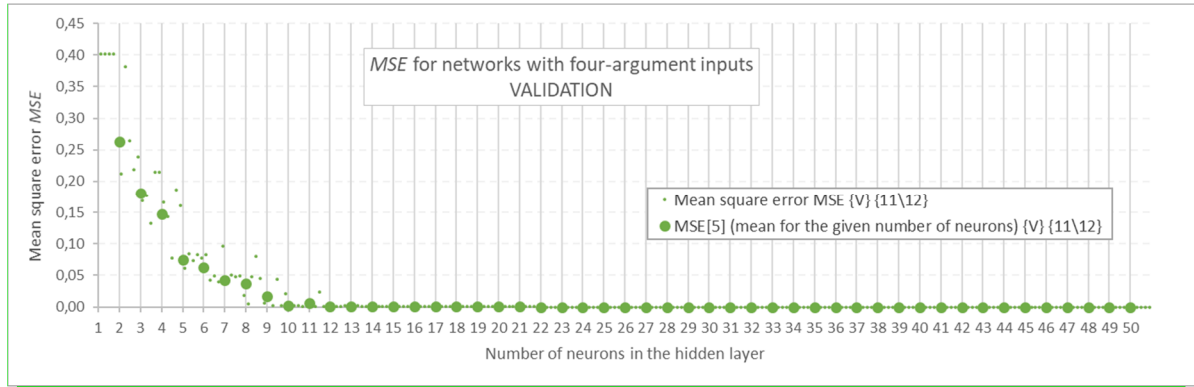

21  
22  
23

Figure A.3. Values of  $MSE$ ,  $MSE_{[5]}$  in dependence of the number of neurons in the hidden layer for networks for 11-samples input, sample no. 12 excluded.

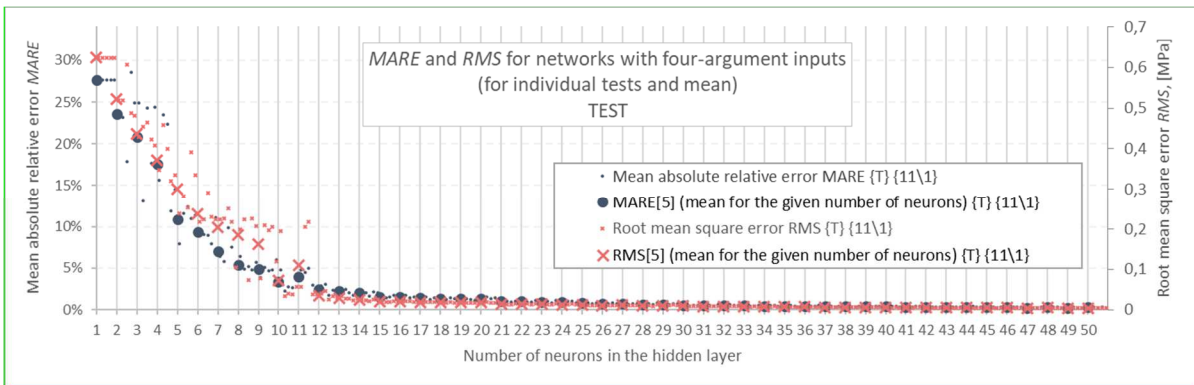

24  
25  
26

Figure A.4. Values of  $MARE$ ,  $MARE_{[5]}$ ,  $RMS$  and  $RMS_{[5]}$  for networks with 11-sample input in dependence of the number of neurons in the hidden layer; data for sample no. 1 excluded from inputs.

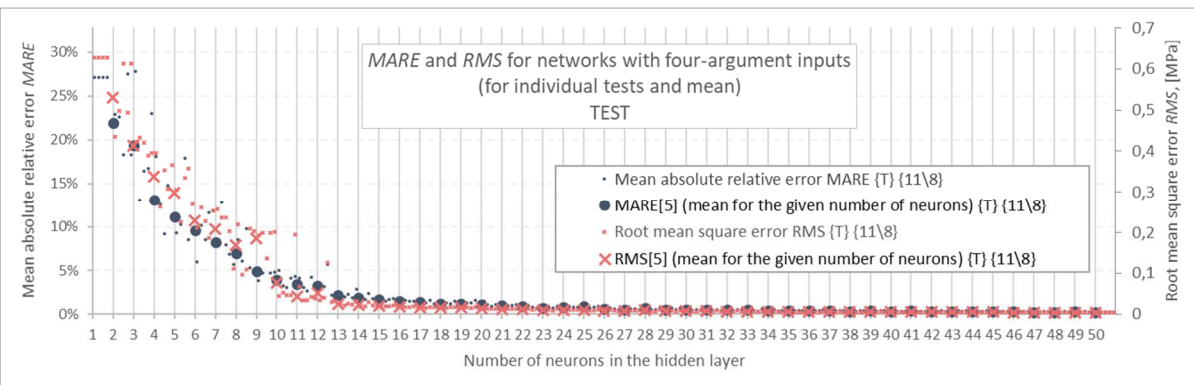

27  
28  
29

Figure A.5. Values of  $MARE$ ,  $MARE_{[5]}$ ,  $RMS$  and  $RMS_{[5]}$  for networks with 11-sample input in dependence of the number of neurons in the hidden layer; data for sample no. 8 excluded from inputs.

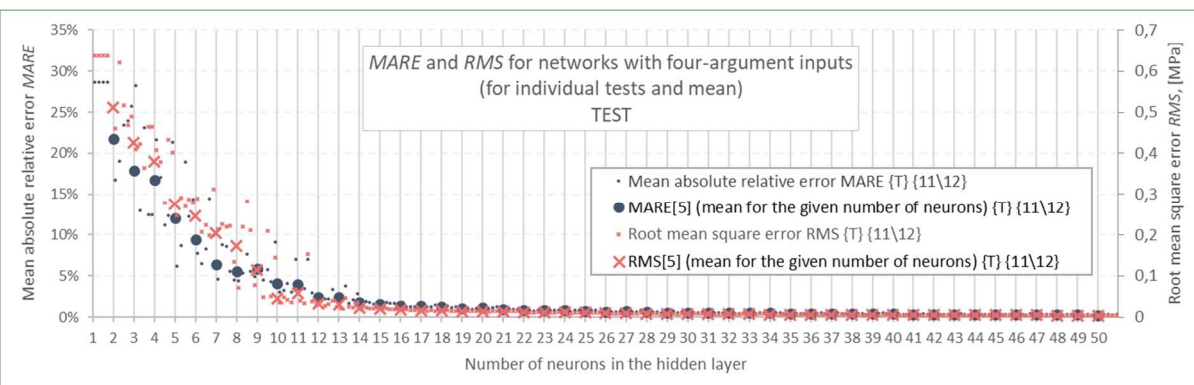

30  
31  
32

Figure A.6. Values of  $MARE$ ,  $MARE_{[5]}$ ,  $RMS$  and  $RMS_{[5]}$  for networks with 11-sample input in dependence of the number of neurons in the hidden layer; data for sample no. 12 excluded from inputs.

33

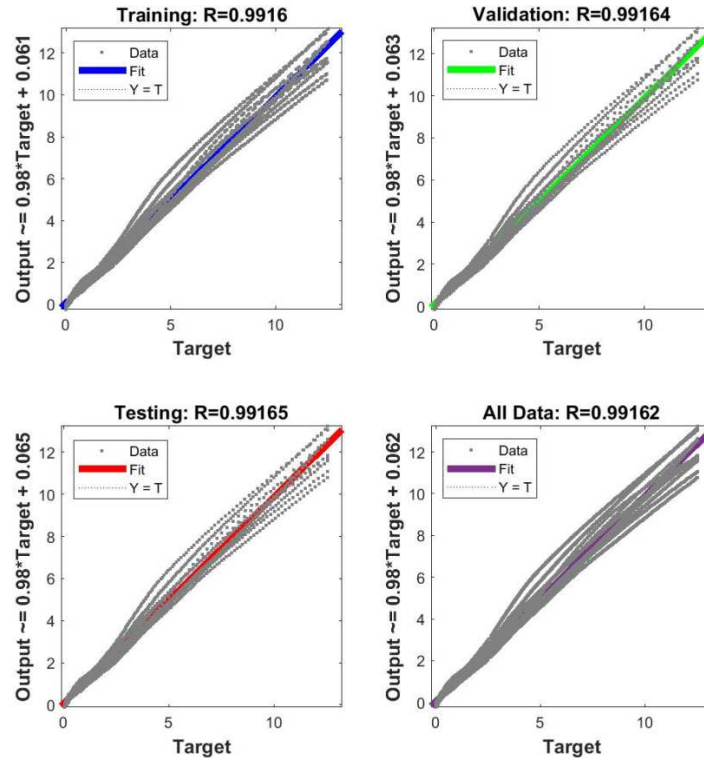

34  
35  
36  
37  
38

Figure A.7. A linear fit between network's outputs and targets for all learning stages separately and combined. For the network taught on 12-specimens set, with 4 neurons in the hidden layer;  $MARE \leq 10\%$  individually for the first time

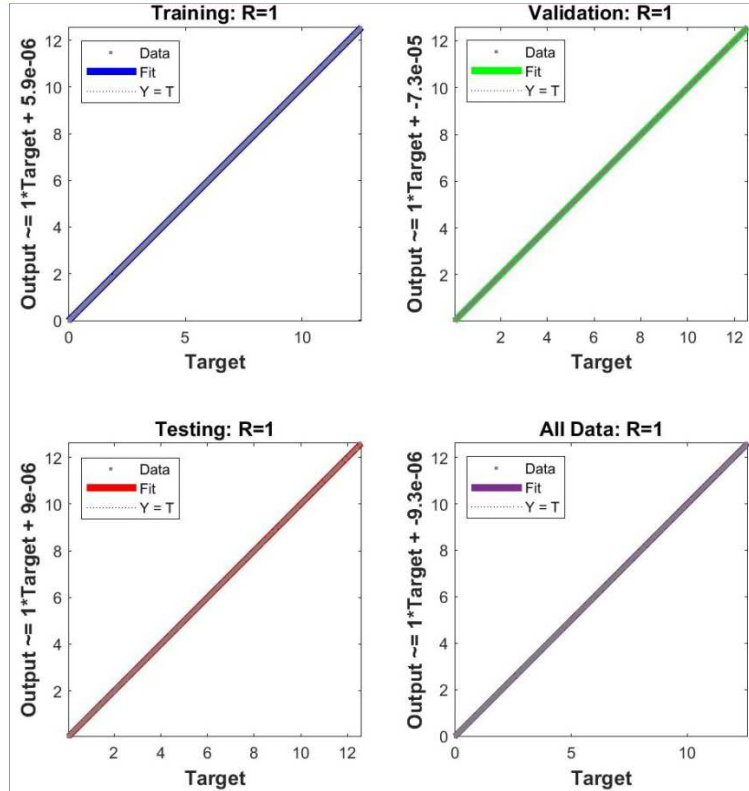

39  
40  
41  
42

Figure A.8. A linear fit between network's outputs and targets for all learning stages separately and combined. For the network taught on 12-specimens set, with 47 neurons in the hidden layer; best  $MARE$ .

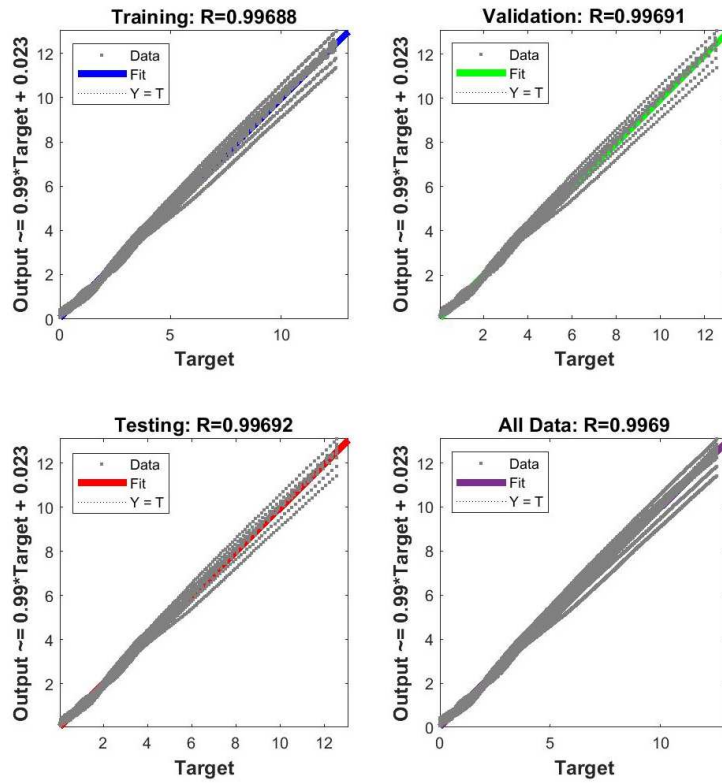

43  
44  
45  
46  
47

Figure A.9. A linear fit between network's outputs and targets for all learning stages separately and combined. For the network taught on 11-specimens set (sample no. 1, excluded) with 5 neurons in the hidden layer;  $MARE \leq 10\%$  individually for the first time.

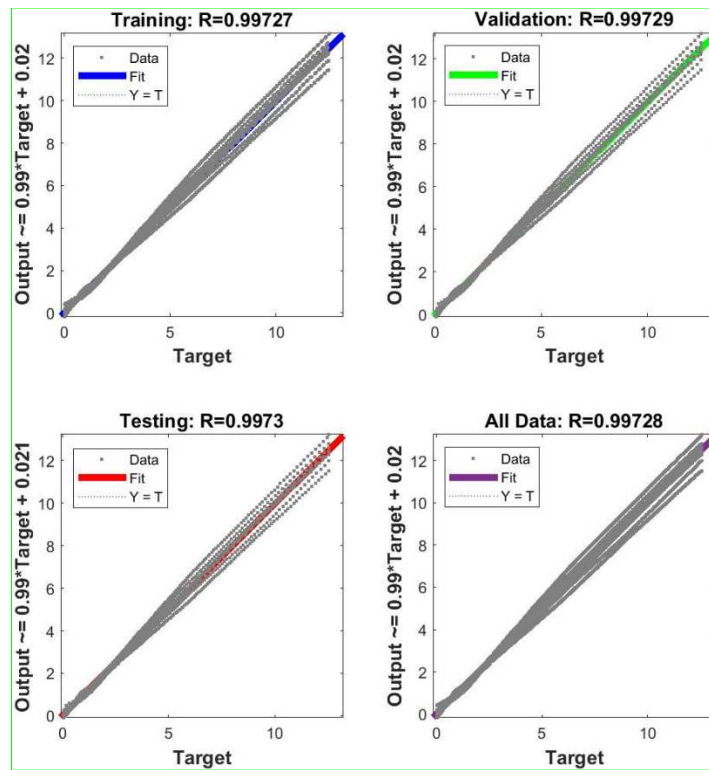

48  
49  
50  
51  
52

Figure A.10. A linear fit between network's outputs and targets for all learning stages separately and combined. For the network taught on 11-specimens set (sample no. 1, excluded) with 8 neurons in the hidden layer;  $MARE \leq 5\%$  individually for the first time.

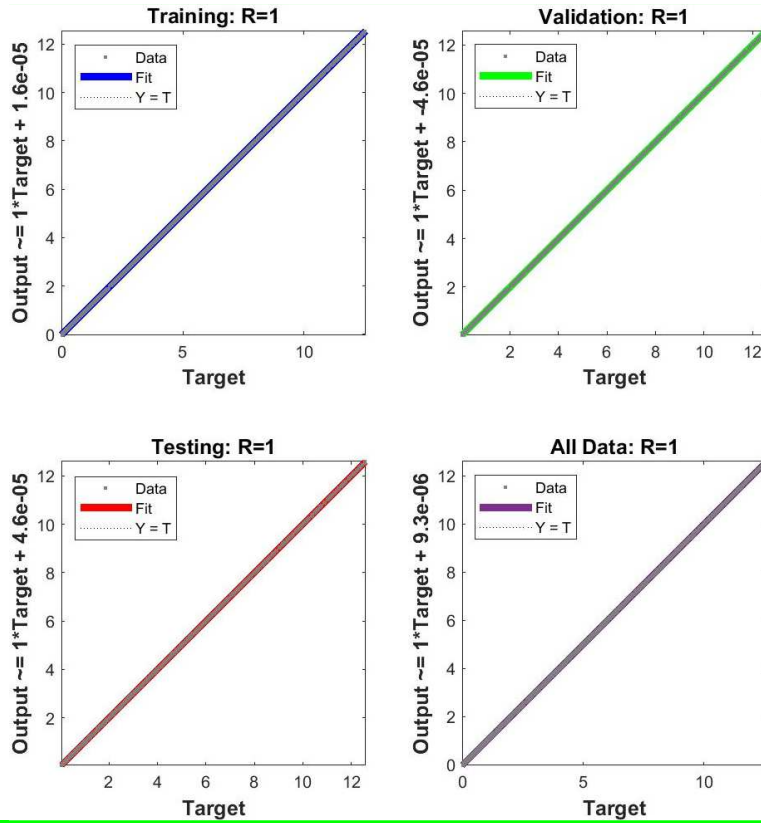

53  
54  
55  
56  
57

Figure A.11. A linear fit between network's outputs and targets for all learning stages separately and combined. For the network taught on 11-specimens set (sample no. 1, excluded) with 47 neurons in the hidden layer; best  $MARE$ .

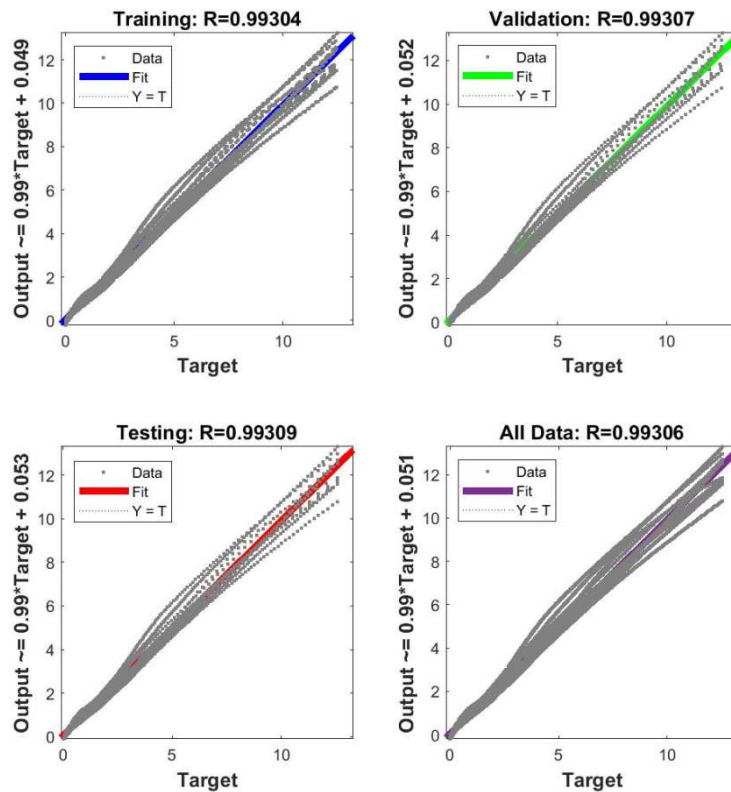

58  
59  
60  
61

Figure A.12. A linear fit between network's outputs and targets for all learning stages separately and combined. For the network taught on 11-specimens set (sample no. 8, excluded) with 4 neurons in the hidden layer;  $MARE \leq 10\%$  individually for the first time.

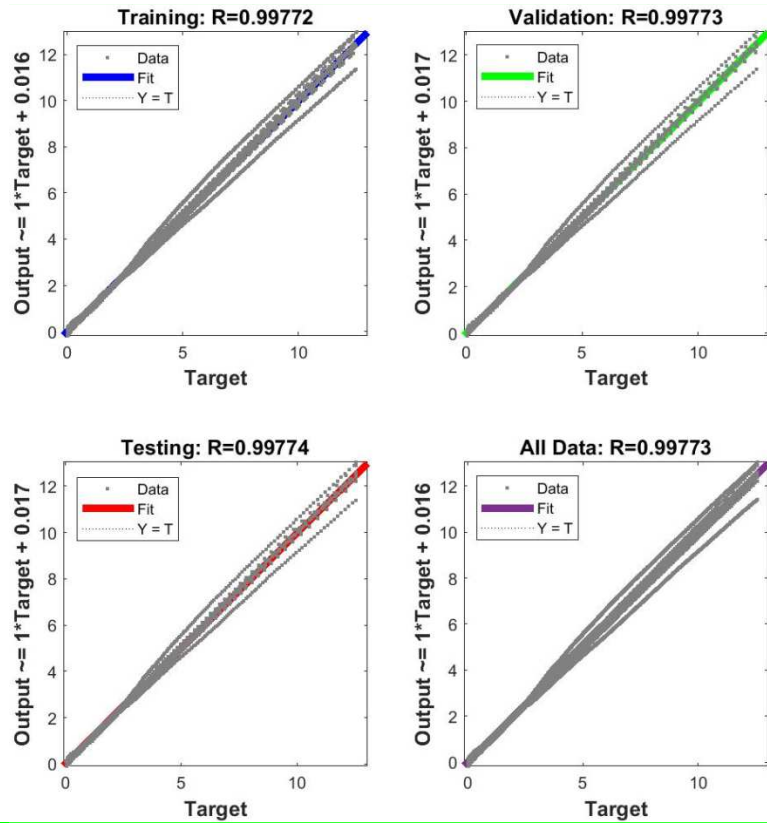

62  
63  
64  
65  
66

Figure A.13. A linear fit between network's outputs and targets for all learning stages separately and combined. For the network taught on 11-specimens set (sample no. 8. excluded) with 8 neurons in the hidden layer;  $MARE \leq 5\%$  individually for the first time.

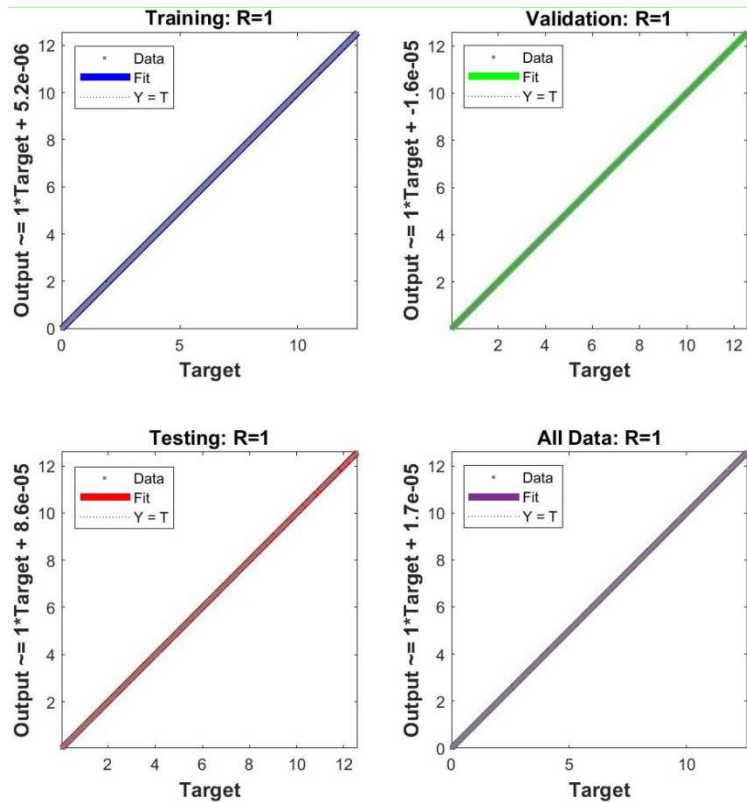

67  
68  
69  
70

Figure A.14. A linear fit between network's outputs and targets for all learning stages separately and combined. For the network taught on 11-specimens set (sample no. 8. excluded) with 48 neurons in the hidden layer; best  $MARE$ .



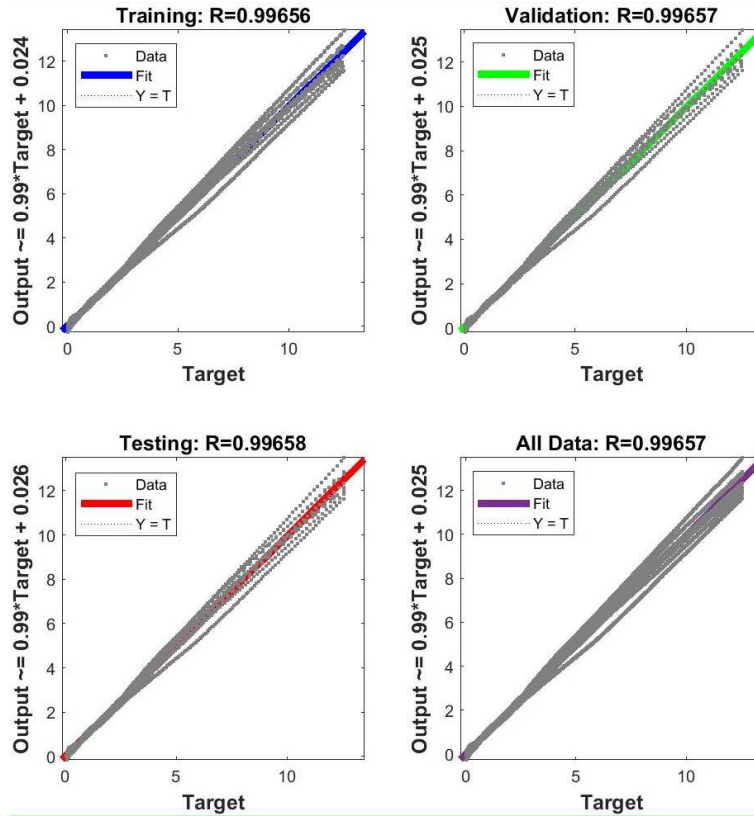

71  
72  
73  
74

Figure A.15. A linear fit between network's outputs and targets for all learning stages separately and combined. For the network taught on 11-specimens set (sample no. 12. excluded) with 5 neurons in the hidden layer;  $MARE \leq 10\%$  individually for the first time.

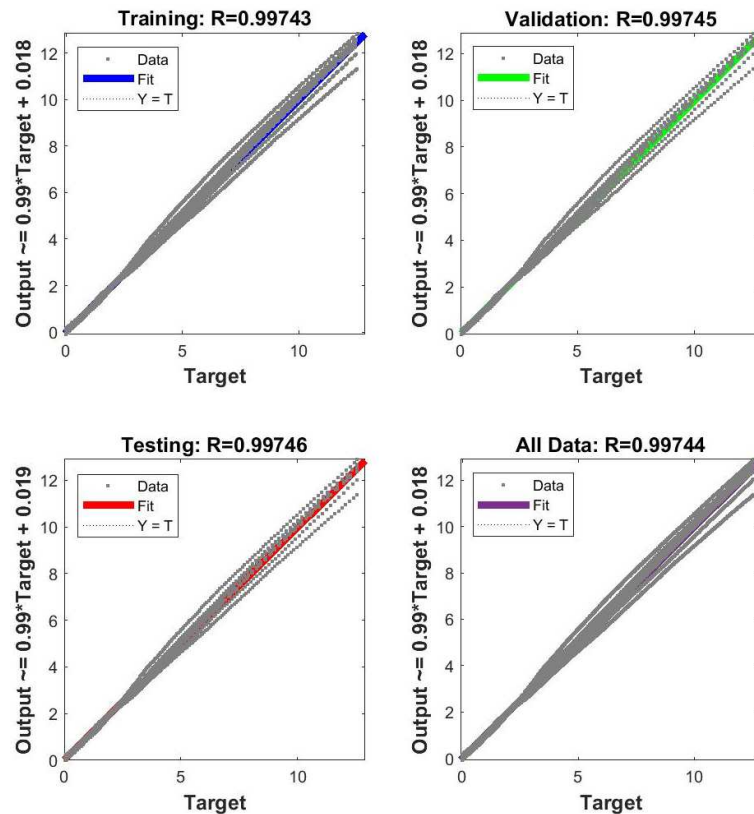

75  
76  
77  
78

Figure A.16. A linear fit between network's outputs and targets for all learning stages separately and combined. For the network taught on 11-specimens set (sample no. 12. excluded) with 7 neurons in the hidden layer;  $MARE \leq 5\%$  individually for the first time.

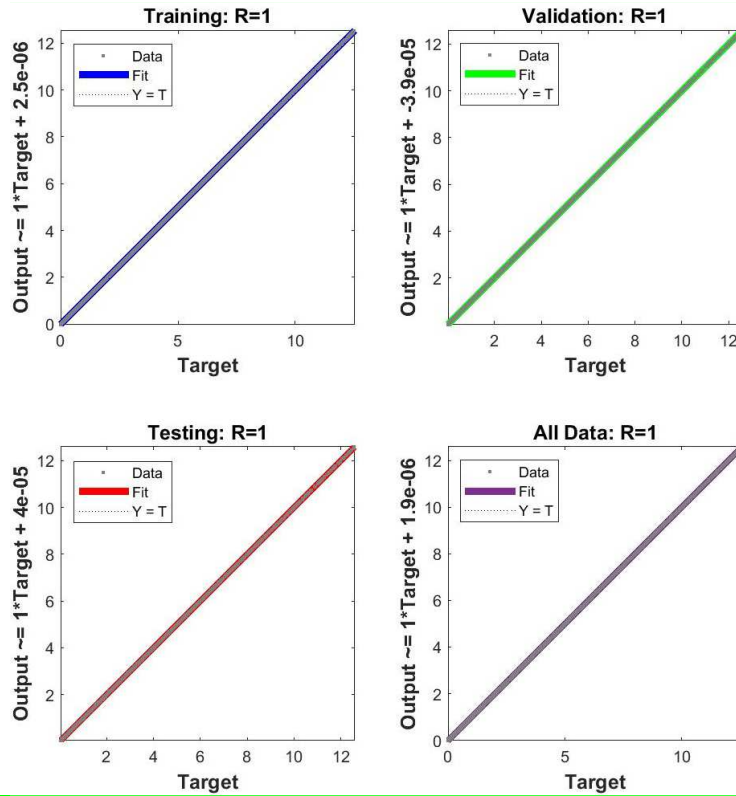

79  
80  
81  
82  
83

Figure A.17. A linear fit between network's outputs and targets for all learning stages separately and combined. For the network taugth on 11-specimens set (sample no. 12. excluded) with 50 neurons in the hidden layer; best  $MARE$ .

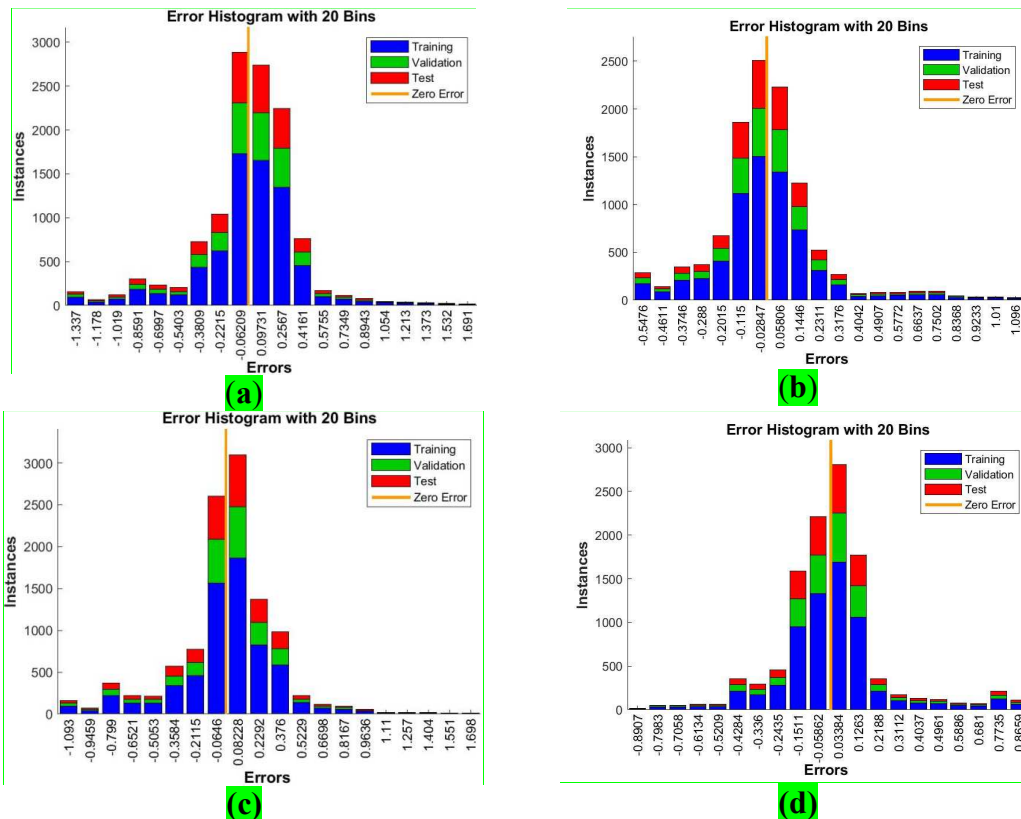

84  
85  
86

Figure A.18. Error histograms for networks for which  $MARE \leq 10\%$  individually for the first time. (a) The 12-samples input, 4 neurons; (b) The 11-samples input (no. 1 excl.), 5 neurons; (c) The 11-samples input (no. 8 excl.), 4 neurons; (d) The 11-samples input (no. 12 excl.), 5 neurons.



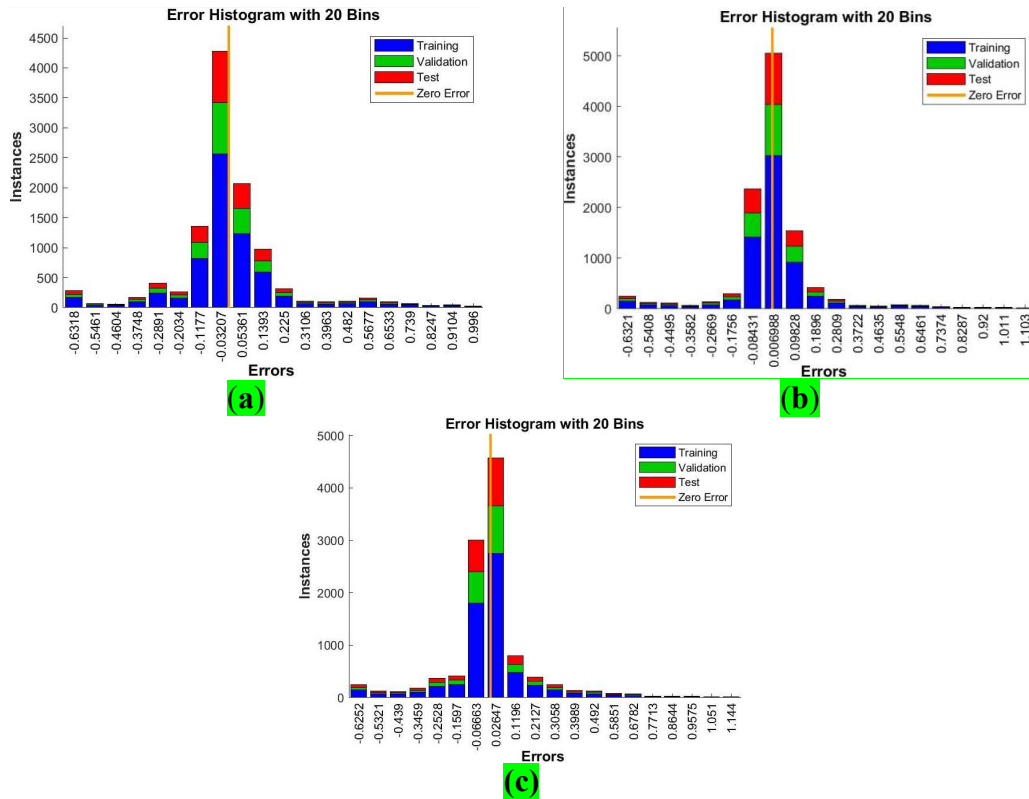

87 Figure A.19. Error histograms for networks for which  $MARE \leq 5\%$  individually for the first time. (a) The 11-  
 88 samples input (no. 1 excl.), 8 neurons; (b) The 11-samples input (no. 8 excl.), 8 neurons; (c) The 11-samples  
 89 input (no. 12 excl.), 7 neurons.

90

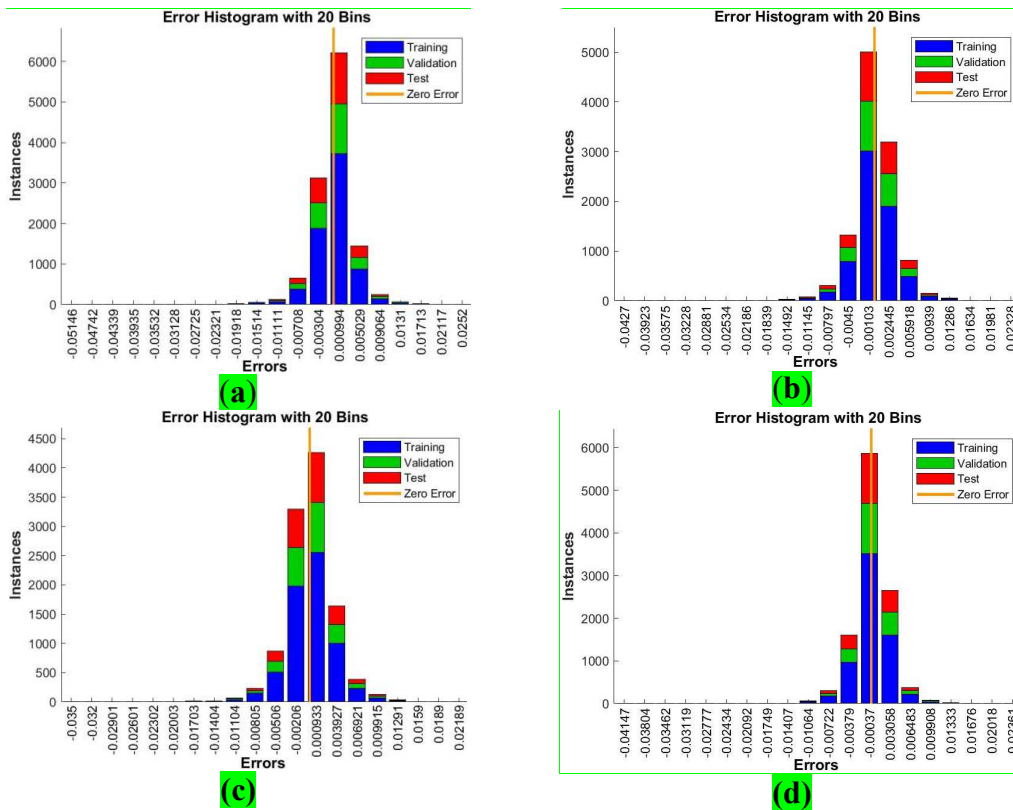

91 Figure A.20. Error histograms for networks for the best  $MARE$ . (a) The 12-samples input, 47 neurons; (b) The  
 92 11-samples input (no. 1 excl.), 47 neurons; (c) The 11-samples input (no. 8 excl.), 48 neurons; (d) The 11-  
 93 samples input (no. 12 excl.), 50 neurons.

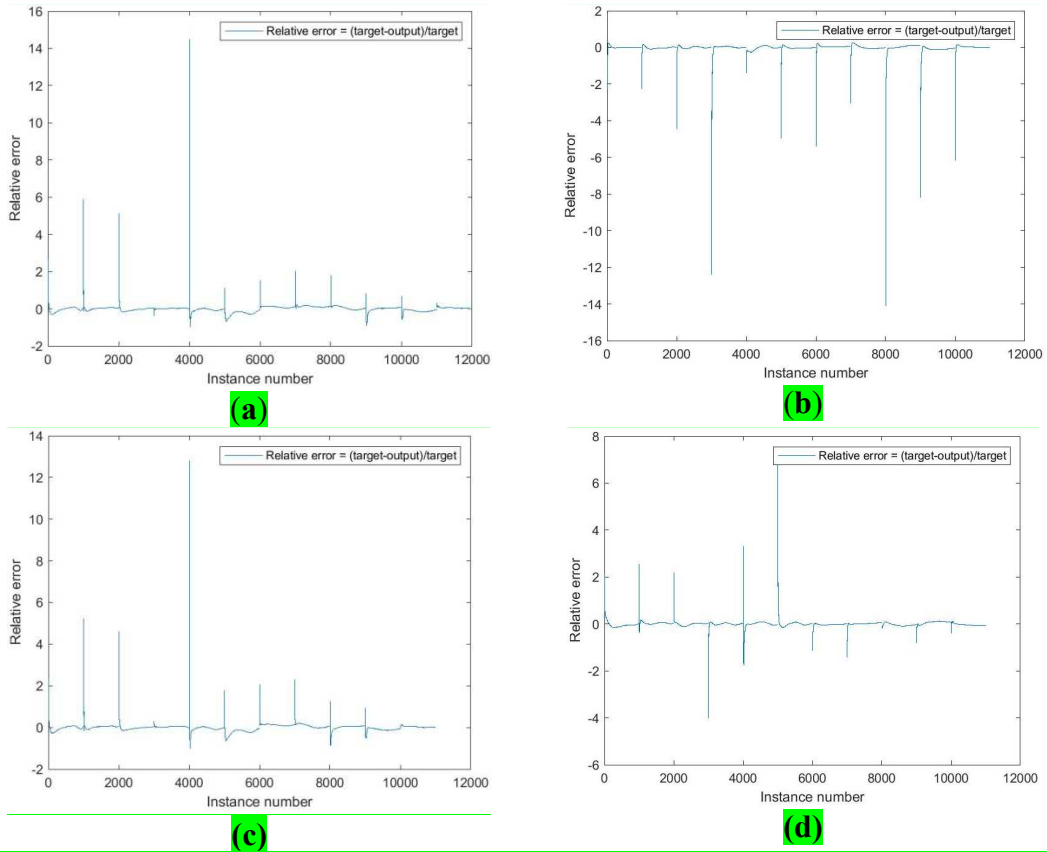

94 **Figure A.21. Relative errors for networks for which  $MARE \leq 10\%$  individually for the first time. (a) The 12-**  
 95 **samples input, 4 neurons; (b) The 11-samples input (no. 1 excl.), 5 neurons; (c) The 11-samples input (no. 8**  
 96 **excl.), 4 neurons; (d) The 11-samples input (no. 12 excl.), 5 neurons.**

97

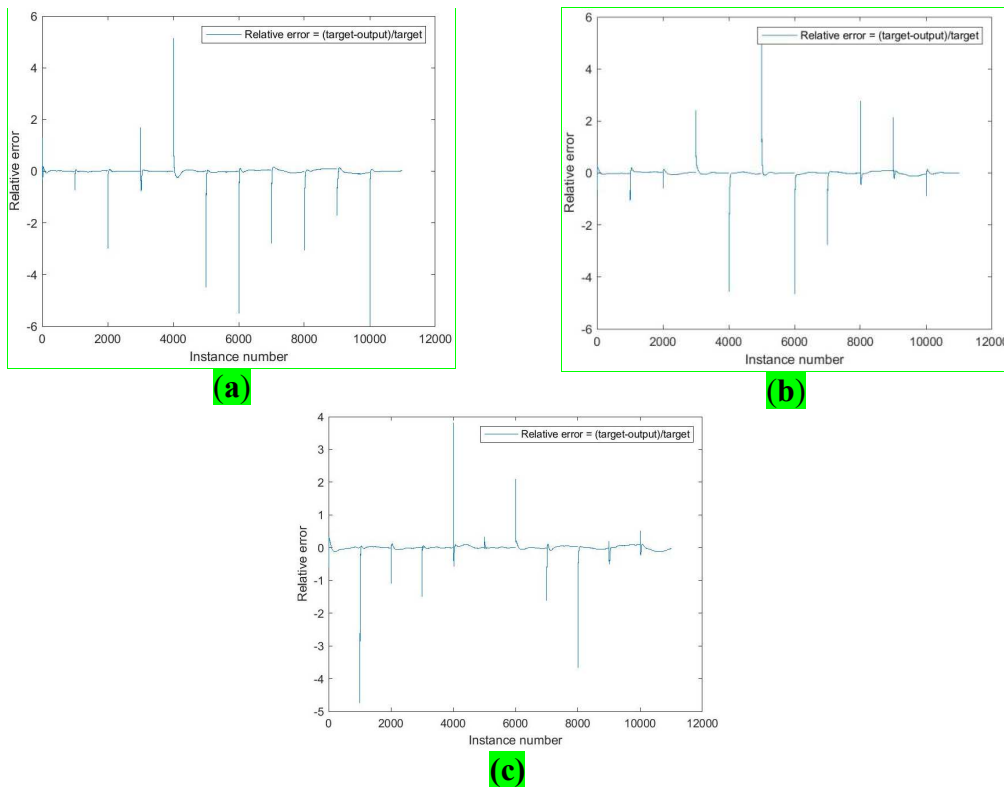

98 **Figure A.22. Relative errors for networks for which  $MARE \leq 5\%$  individually for the first time. (a) The 11-**  
 99 **samples input (no. 1 excl.), 8 neurons; (b) The 11-samples input (no. 8 excl.), 8 neurons; (c) The 11-samples**  
 100 **input (no. 12 excl.), 7 neurons.**

101

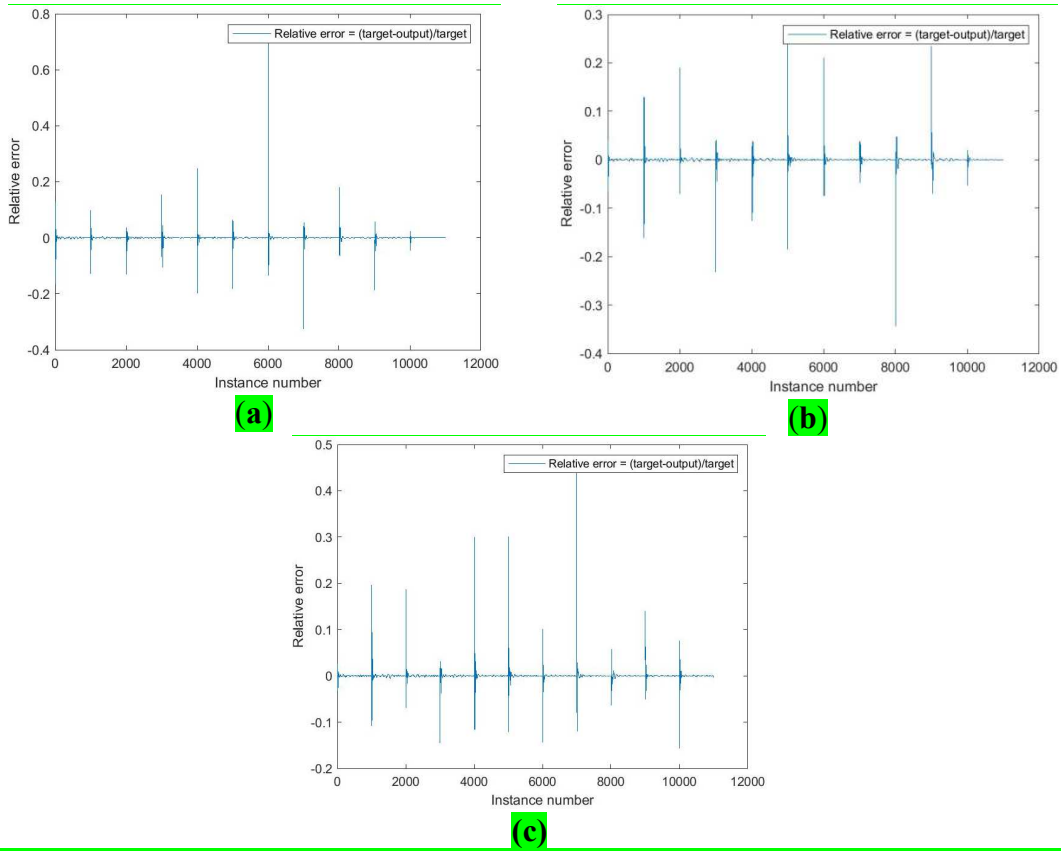

102 **Figure A.23. Relative errors for networks for the best *MARE*. (a) The 11-samples input (no. 1 excl.), 47**  
 103 **neurons; (b) The 11-samples input (no. 8 excl.), 48 neurons; (c) The 11-samples input (no. 12 excl.), 50 neurons.**  
 104

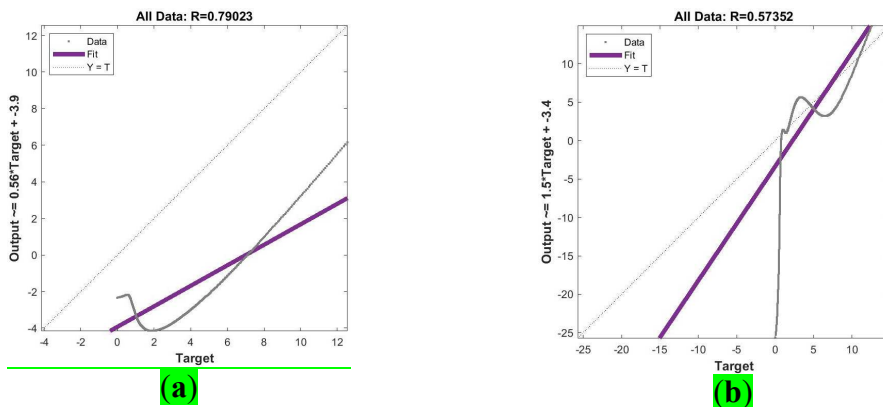

105 **Figure A.24. Regression line from testing of the network taught on 11-specimens set (sample 1 excl.).**  
 106 **(a) Structure with 5 neurons; (b) Structure with 47 neurons.**  
 107  
 108

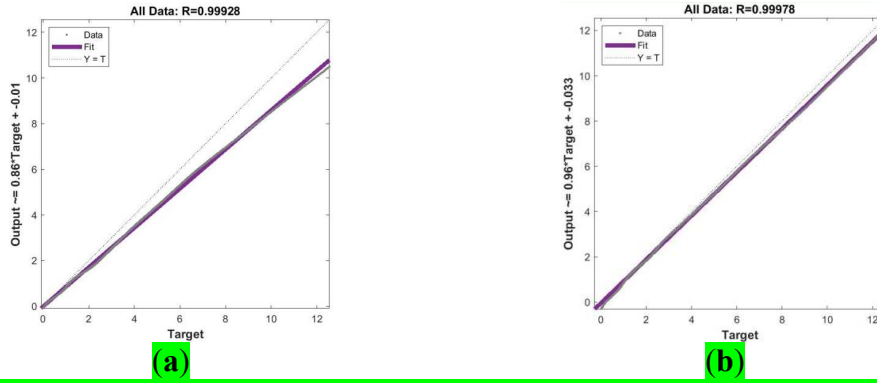

Figure A.25. Regression line from testing of the network taught on 11-specimens set (sample 8 excl.).  
 (a) Structure with 4 neurons; (b) Structure with 48 neurons.

109  
 110  
 111

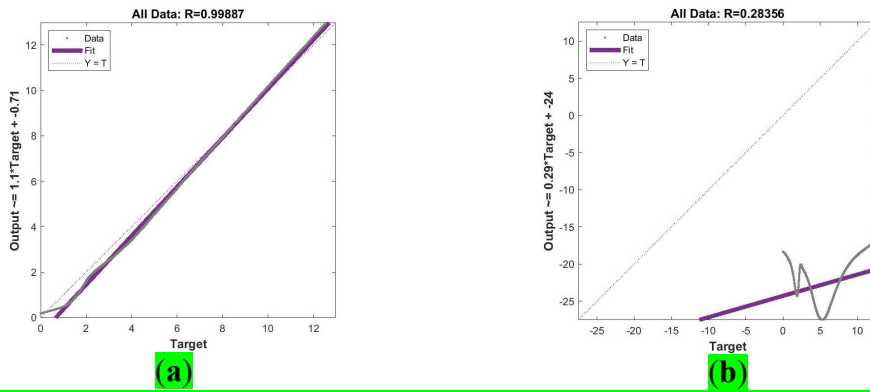

Figure A.26. Regression line from testing of the network taught on 11-specimens set (sample 12 excl.).  
 (a) Structure with 5 neurons; (b) Structure with 50 neurons.

112  
 113  
 114

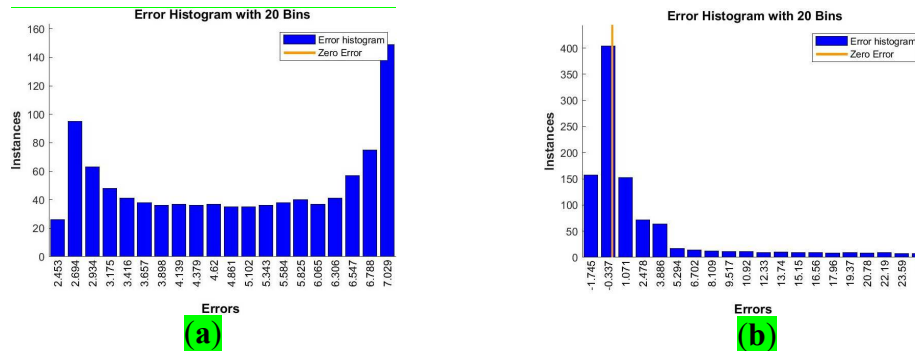

Figure A.27. Error histogram from testing of the network taught on 11-specimens set (sample 1 excl.).  
 (a) Structure with 5 neurons; (b) Structure with 47 neurons.

115  
 116  
 117

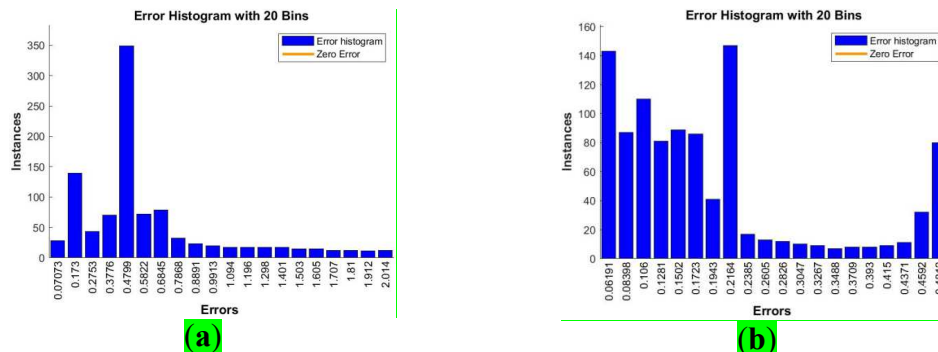

Figure A.28. Error histogram from testing of the network taught on 11-specimens set (sample 8 excl.).  
 (a) Structure with 4 neurons; (b) Structure with 48 neurons.

118  
 119

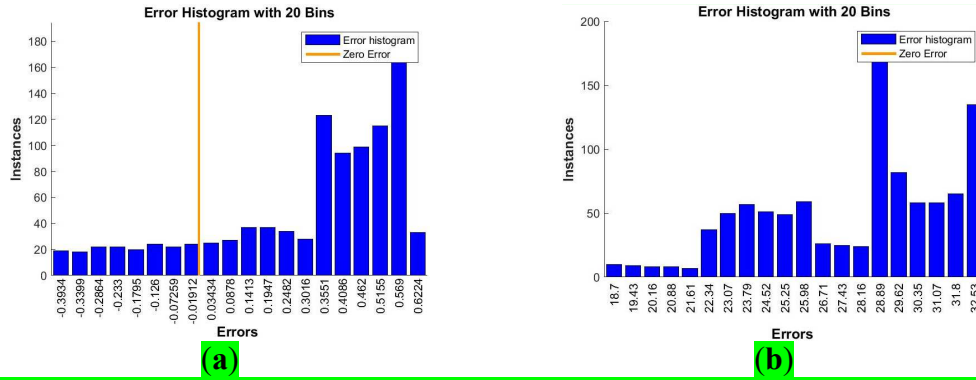

Figure A.29. Error histogram from testing of the network taught on 11-specimens set (sample 12 excl.). (a) Structure with 5 neurons; (b) Structure with 50 neurons.

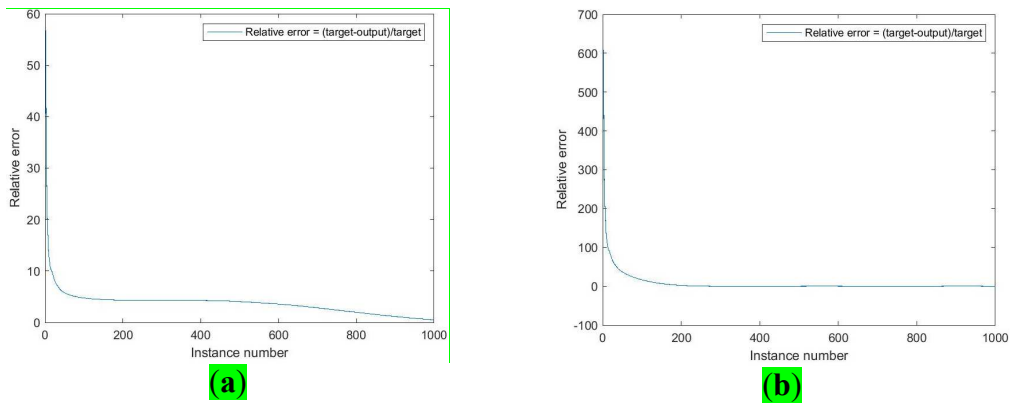

Figure A.30. Relative errors from testing of the network taught on 11-specimens set (sample 1 excl.). (a) Structure with 5 neurons; (b) Structure with 47 neurons.

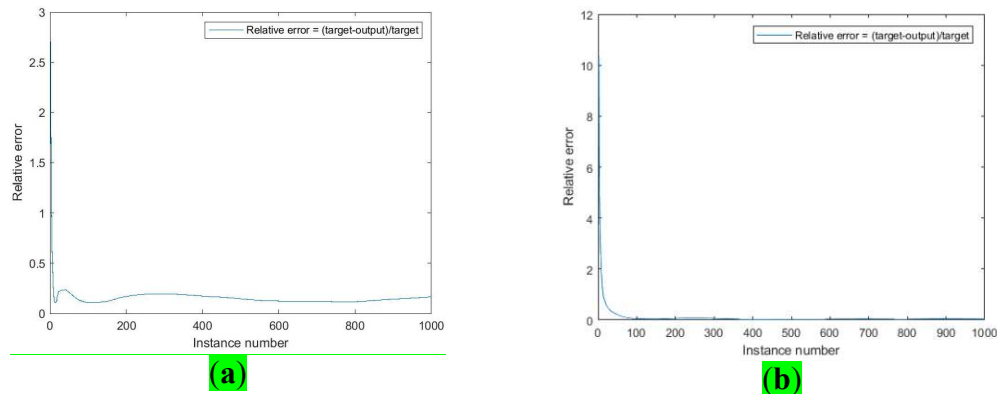

Figure A.31. Relative errors from testing of the network taught on 11-specimens set (sample 8 excl.). (a) Structure with 4 neurons; (b) Structure with 48 neurons.

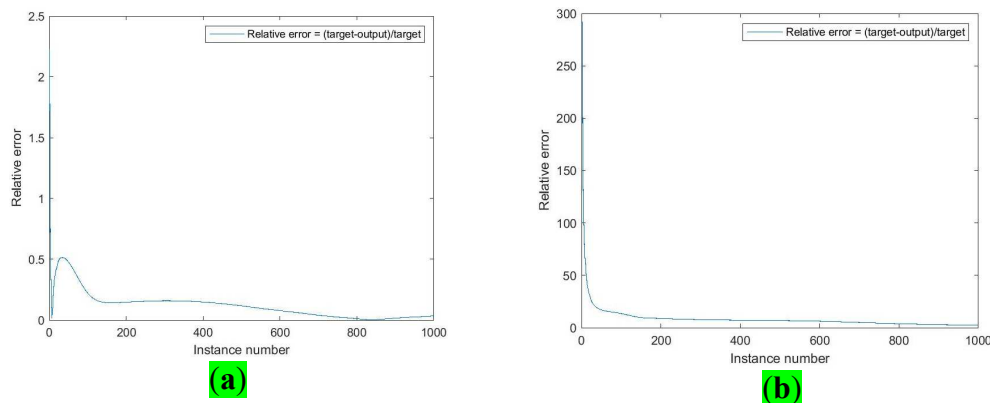

Figure A.32. Relative errors from testing of the network taught on 11-specimens set (sample 12 excl.). (a) Structure with 5 neurons; (b) Structure with 50 neurons.

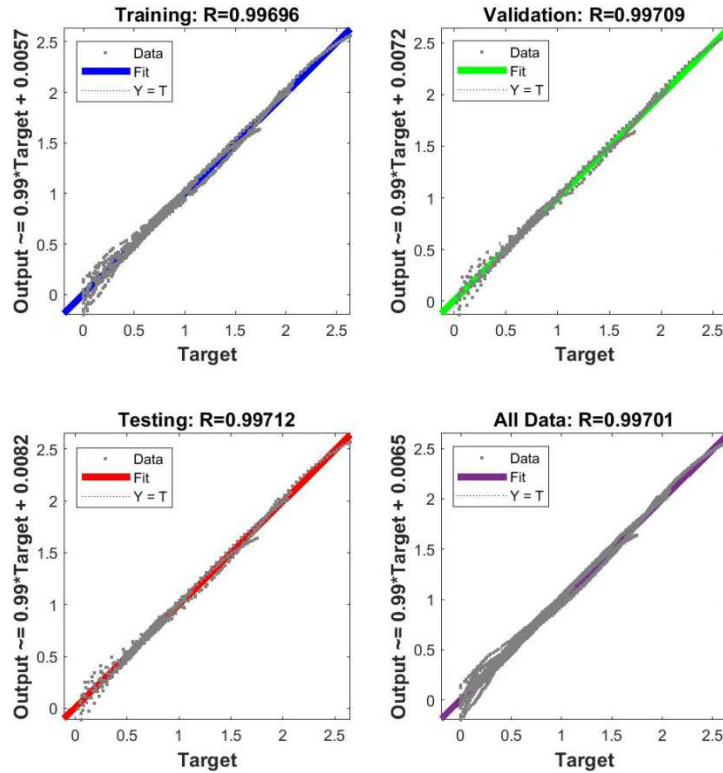

128  
129  
130  
131  
132

Figure A.33. A linear fit between network's outputs and targets for all learning stages separately and combined for the network taught on 11-specimens set (no. 8 excl.), with 4 neurons in the hidden layer. Case with 200 initial experimental data only.

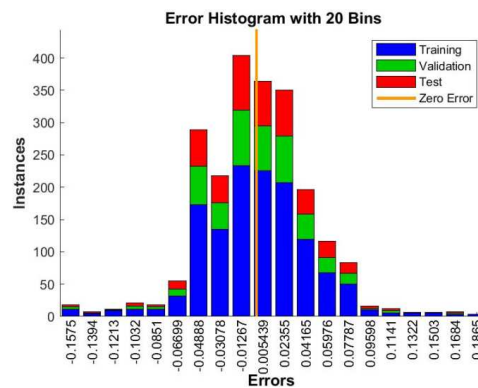

133  
134  
135  
136

Figure A.34. Error histogram for the network taught on 11-specimens set (no. 8 excl.), with 4 neurons in the hidden layer. Case with 200 initial experimental data only.

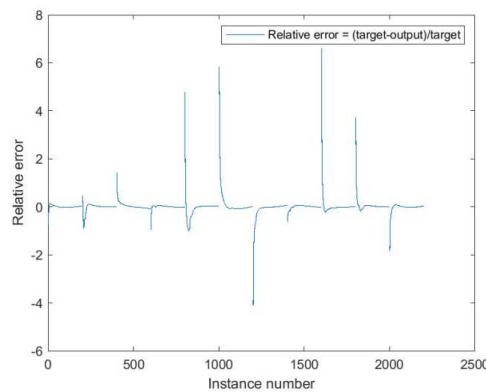

137  
138  
139

Figure A.35. Relative errors for the network taught on 11-specimens set (no. 8 excl.), with 4 neurons in the hidden layer. Case with 200 initial experimental data only.



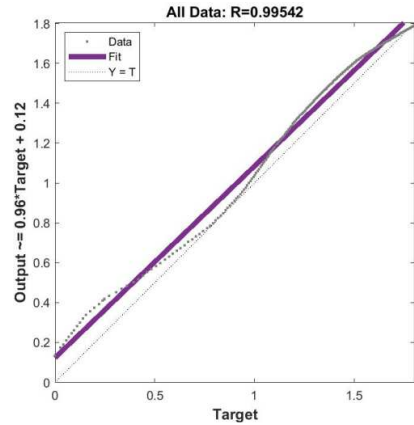

140  
141  
142  
143

Figure A.36. Regression line from testing of the network taught on 11-specimens set with 4 neurons. Case with 200 initial experimental data only, sample 8.

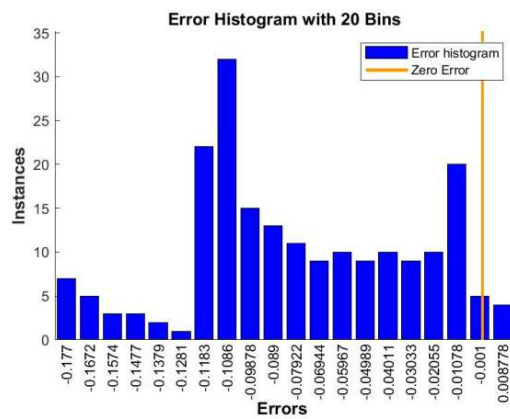

144  
145  
146  
147

Figure A.37. Error histogram from testing of the network taught on 11-specimens set with 4 neurons. Case with 200 initial experimental data only, sample 8.

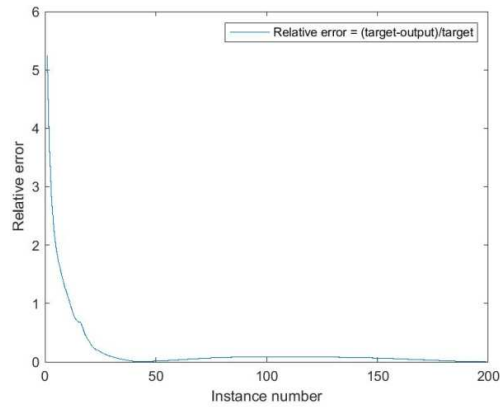

148  
149  
150

Figure A.38. Relative errors from testing of the network taught on 11-specimens set with 4 neurons. Case with 200 initial experimental data only, sample 8.
